# Supplementary material
Source: publisher site journal article supplement (https://www.dovepress.com/article/229992)
Supplement: Supplementary file 1 [file get_supplementary_file.php]

**Supporting Information**

ORIGINAL RESEARCH

Yike Huang, Suya Deng et al

**Evaluation of intestinal absorption mechanism and pharmacokinetics of curcumin-loaded galactosylated albumin nanoparticles**

Yike Huang1

Suya Deng1

Xinxin Luo

Yi Liu

Wanjun Xu

Jingmiao Pan

Wang Min

Zhining Xia*

School of Pharmaceutical Sciences and Innovative Drug Research Centre, Chongqing University, Chongqing, 401331, China

*Co-Correspondence: Professor Zhining Xia

1The authors contributed equally to this work

Chongqing University Huxi Campus, No.55 Daxuecheng South Rd., Shapingba, Chongqing, 401331, China

Tel: +86-13883077188

Email: [znxia@cqu.edu.cn](mailto:znxia@cqu.edu.cn)

**Method validation**

**Specificity**

The three groups of blank plasma, blank plasma spiked with curcumin, and the plasma samples after oral administration were analyzed by HPLC.

**Figure S1** Representative chromatograms of samples. (1) The plasma samples after oral administration. (2) Blank plasma spiked with curcumin. (3) Blank plasma.

The chromatograms of the plasma samples after oral administration, blank plasma spiked with curcumin and blank plasma were shown in figure S1. The interfering substances were not observed at the retention time of the curcumin in the established chromatographic condition.

**Linearity and sensitivity**

200 μg/mL of curcumin methanol solution was prepared as original solution and stored at 4 ℃. 200 μL of blank plasma was first pipetted into a 1.5 EP tube. Then curcumin solution was added into tubes to reach the concentration of 12.5, 25, 50, 75, 100, 200, and 400 ng/mL, respectively. Following procedure was the same as “Sample preparation” in method and materials section of the manuscript. The calibration curve was constructed by plotting the peak area (Y) and concentrations of the standards (X).

The lower limit of quantification (LLOQ) was detected at the lowest concentration of the calibration curve with signal-to-noise ratio (S/N) of 10:1. The lower limit of detection (LLOD) was determined as the lowest concentration level in 3:1 of S/N.

**Extraction recovery**

The mean extraction recovery rate of curcumin at low, medium, and high concentrations was shown in Table S1. The results met the demand of concentration determination of curcumin.

**Table S1** Extraction recovery rate of curcumin in rat plasma (n=6)

| Spiked curcumin concentration (ng/mL) | Extraction recovery | |
| --- | --- | --- |
| mean ± SD (%) | RSD (%) |
| 50 | 88.3±4.6 | 5.2 |
| 200 | 103.4±3.5 | 3.4 |
| 400 | 99.7±2.2 | 2.2 |

**Abbreviations:** SD, standard deviation; RSD, relative standard deviation.

**Precision and accuracy**

Precision and accuracy were evaluated by determining the Cur samples at 50, 200 and 400 ng/mL in five replicates on the same day. Inter-day accuracy and precision were detected by repeated analysis of the three mentioned concentration of Cur samples for five consecutive days. The concentrations of these samples were obtained from the calibration curves.

**Table S2.** Within-day and inter-day precision and accuracy for the measure of the curcumin (n=5)

| Nominal curcumin concentration | Within-day | | | | Inter-day | | | |
| --- | --- | --- | --- | --- | --- | --- | --- | --- |
| ng/mL | Mean (ng/mL) | SD | CV% | RE% | Mean (ng/mL) | SD | CV% | RE% |
| 50.0 | 51.5 | 2.0 | 3.8 | 6.8 | 50.3 | 2.3 | 4.5 | 4.3 |
| 200.0 | 182.2 | 2.2 | 1.2 | -5.2 | 178.9 | 7.8 | 4.3 | -6.8 |
| 400.0 | 363.0 | 175.6 | 1.3 | -5.5 | 361.4 | 6.0 | 1.7 | -5.9 |

**Abbreviations:** SD, standard deviation; CV, coefficient of variance; RE, relative error.

The precision and accuracy of curcumin samples were shown in Table S2. The within-day precision (CV) was 1.2%-3.8%, and the accuracy (RE) was -5.5%- 8.8%. The inter-day precision (CV) was 1.7%-4.5%, and the accuracy (RE) was -6.8%- 4.3%. The CV of both the within-day and inter-day precision were less than 15 %, and the RE of accuracy was with the range of -15% to 15%. Therefore, the results indicate that the method has good precision and accuracy.
